# Supplementary material
Source: publisher figshare collection journal article supplement (https://springernature.figshare.com/ndownloader/files/22737164)
Supplement: Supplementary file [file 22737164]

| Table S4 Comparison between the degree of humanization existing and perceived, in the seven hospital wards categorized under the three types of settings |                        |                 |       |                                                            |                 |        |                                       |                 |        |
|----------------------------------------------------------------------------------------------------------------------------------------------------------|------------------------|-----------------|-------|------------------------------------------------------------|-----------------|--------|---------------------------------------|-----------------|--------|
| Setting Children's Hospital (A)                                                                                                                          |                        |                 |       | Setting Pediatric Department of University Hospital (B, C) |                 |        | Setting General Hospital (D, E, F, G) |                 |        |
|                                                                                                                                                          | Existing* (score)      | Perceived** (%) |       | Existing* (score)                                          | Perceived** (%) |        | Existing* (score)                     | Perceived** (%) |        |
|                                                                                                                                                          |                        | Parent          | Staff |                                                            | Parent          | Staff  |                                       | Parents         | Staff  |
| Space Comfort                                                                                                                                            | Criteria 2.3.1***=0.56 | 88.9%           | 55.6% | Criteria 2.3.1***=0,62                                     | 73,1%           | 28,35% | Criteria 2.3.1***=6,21                | 72,63%          | 51,9%  |
|                                                                                                                                                          | Criteria 2.3.2***=1.31 |                 |       |                                                            |                 |        | Criteria 2.3.2***=3.11                |                 |        |
| Orientation                                                                                                                                              | Criteria 2.2.1***=0    | 69.7%           | 66.7% | Criteria 2.2.1****=3,33                                    | 77%             | 83,35% | Criteria 2.2.1***=2,5                 | 67,15%          | 77,83% |
| Mediation/translation/interp<br>retation services                                                                                                        | Criteria 1.3.1***=2    | /               | 33.3% | Criteria 1.3.1***=0                                        |                 | 18,35% | Criteria 1.3.1***=1,5                 |                 | 32,85  |

\*average criteria scores; \*\*% positive answers

\*\*\*Criteria 1.3.1: respect for linguistic specificities; 2.2.1: orientation and signage; 2.3.1: equipment and characteristics of the wards; 2.3.2: specific features and characteristics of the wards

Gray boxes indicate critical criteria according to the National Agency for Regional Health Services (Agenas) checklist for the existing, or negative answers according to Listening to people to Cure people (LpCp)-tool for the perceived .
